# Supplementary material for: Real-Time Continuous Glucose Monitoring in Critically Ill Patients: A prospective randomized trial
Source: PubMed Central journal article supplement — Diabetes Care. 2009 Dec 10;33(3):467–72. doi: 10.2337/dc09-1352 (PMC2827490; doi:10.2337/dc09-1352), 2009-12-10
Supplement: supp_dc09-1352_dc09-1352_online_appendix.pdf [file supp_dc09-1352_dc09-1352_online_appendix.pdf]

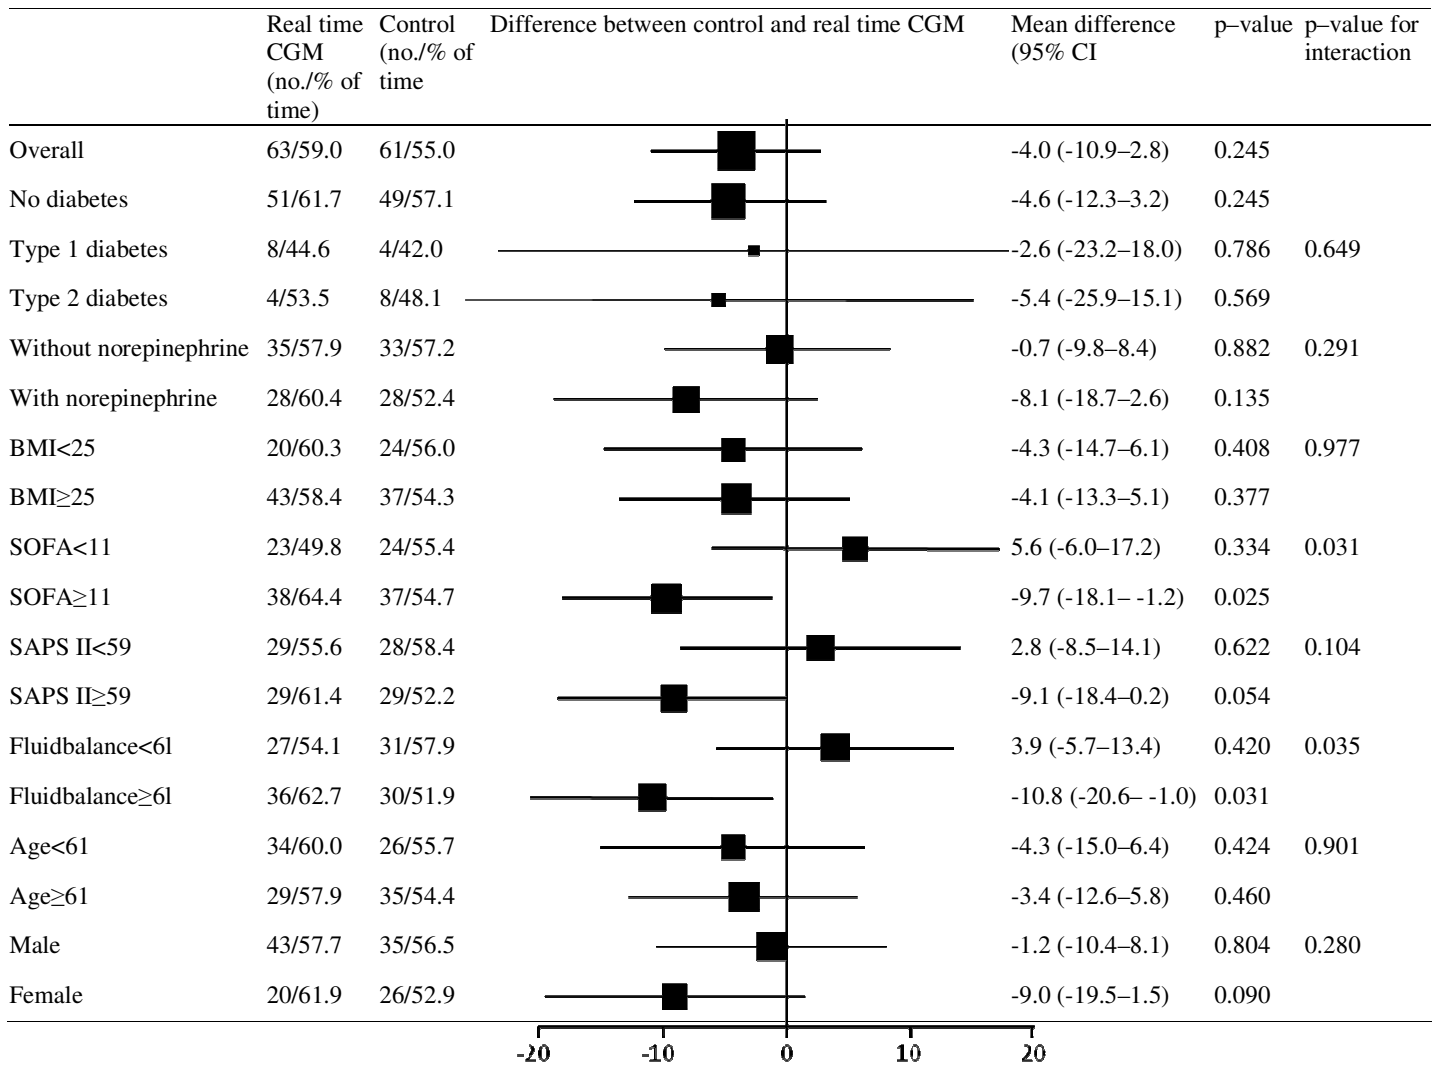

**Figure A:** Subgroup analysis concerning primary endpoint: Blood glucose < 110mg/dl  
 The difference of the primary endpoint is shown for the whole group and 17 post hoc subgroups. The size of the squares is proportional to the size of the corresponding subgroup. CGM=continuous glucose monitoring. BMI=Body Mass Index. SOFA= Sepsis-related Organ Failure Assessment. SAPS= Simplified Acute Physiology Score.
